# Supplementary material
Source: PubMed Central journal article supplement (PMC1450137)

**A**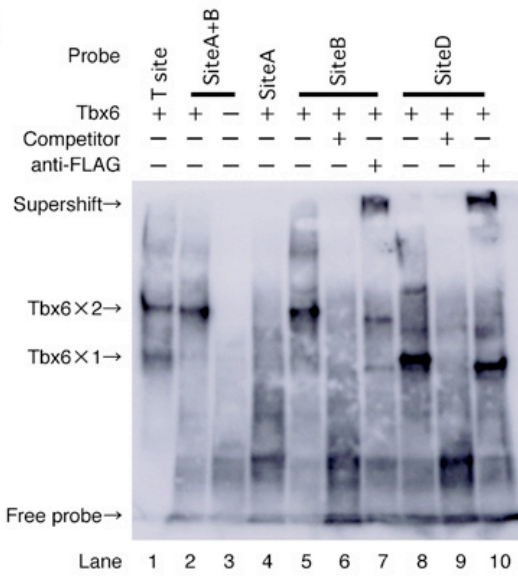**B**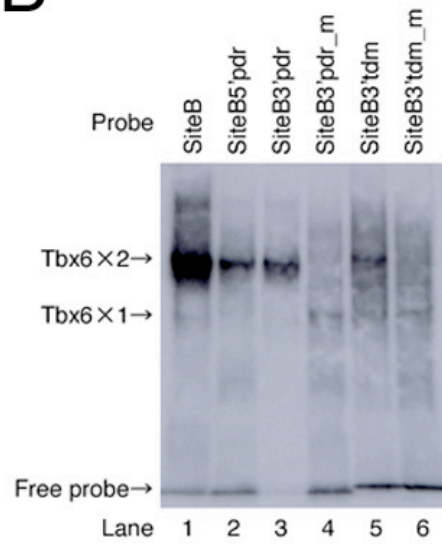**C**

SiteB: CCTTCGAGGGGTCAGAATCCACACCTCTGCAAATGGGCCCGCTTT  
 T site: CCTTCAGGTGTGAAATTAATTTACACCTTGCAAATGGGCCCGCTTT  
 5'pdr: CCTTCGAGGGGTCAGATCTGACCCCTCTGCAAATGGGCCCGCTTT  
 3'pdr: CCTTCGAGGTGTGGATATCCACACCTCTGCAAATGGGCCCGCTTT  
 3'pdr\_m: CCTTCGAGGTGTGGATATCgAtAtCTCTGCAAATGGGCCCGCTTT  
 3'tdm: CCTTCATCCACACCTCgggcccATCCACACCTCTGCAAATGGGCCCGCTTT  
 3'tdm\_m: CCTTCATCCACACCTCgggcccATCgAtAtCTCTGCAAATGGGCCCGCTTT

**D**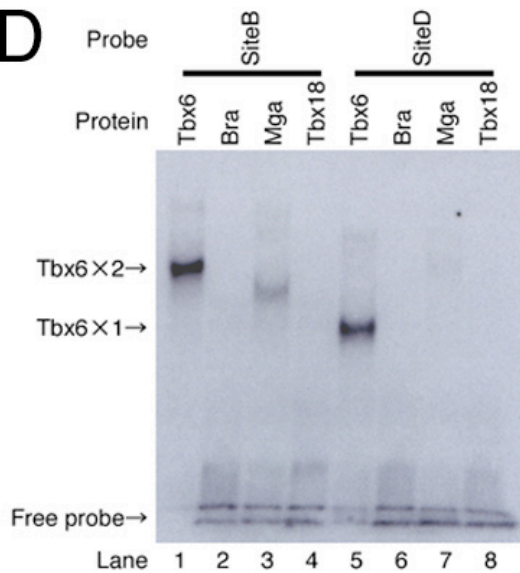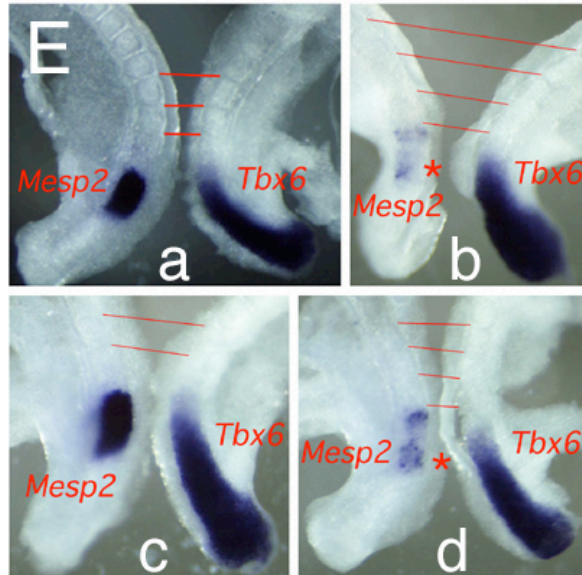

Supplement: pnas_0508238103_1.pdf [file pnas_0508238103_1.pdf]
